# Supplementary material
Source: HighWire-hosted journal article supplement (https://jhr.uwpress.org/highwire/filestream/2074/field_highwire_adjunct_files/1/0419-10183R1_supp.pdf)
Supplement: 0419-10183R1_supp.pdf [file 0419-10183R1_supp.pdf]

# **Depression, Risk Preferences and Risk-taking Behavior**

## **Online Appendix**

**Deborah A. Cobb-Clark**

**Sarah C. Dahmann**

**and**

**Nathan Kettlewell**

## Appendix A – Supplementary Tables and Figures

Table A1

SOEP SF-12 Questionnaire.

| Question                                                                                                                                                                                                    | Answers                                             |
|-------------------------------------------------------------------------------------------------------------------------------------------------------------------------------------------------------------|-----------------------------------------------------|
| How would you describe your current health?                                                                                                                                                                 | Very good/ Good/<br>Satisfactory/ Poor/<br>Bad      |
| When you have to climb several flights of stairs on foot, does your health limit you greatly, somewhat, or not at all?                                                                                      | Greatly/ Somewhat/<br>Not at all                    |
| And what about other demanding everyday activities, such as when you have to lift something heavy or do something requiring physical mobility: Does your health limit you greatly, somewhat, or not at all? | Greatly/ Somewhat/<br>Not at all                    |
| During the last four weeks, how often did you...                                                                                                                                                            | Always/ Often/<br>Sometimes/ Almost<br>never/ Never |
| <b>...feel down and gloomy?</b>                                                                                                                                                                             |                                                     |
| <b>...feel calm and relaxed?</b>                                                                                                                                                                            |                                                     |
| <b>...feel energetic?</b>                                                                                                                                                                                   |                                                     |
| ...have severe physical pain?                                                                                                                                                                               |                                                     |
| ...feel that due to physical health problems you achieved less than you wanted to at work or in everyday activities?                                                                                        |                                                     |
| ...feel that due to physical health problems you were limited in some way at work or in everyday activities?                                                                                                |                                                     |
| <b>... feel that due to mental health or emotional problems you achieved less than you wanted to at work or in everyday activities?</b>                                                                     |                                                     |
| <b>...feel that due to mental health or emotional problems you carried out your work or everyday tasks less thoroughly than usual?</b>                                                                      |                                                     |
| <b>...feel that due to physical or mental health problems you were limited socially, that is, in contact with friends, acquaintances, or relatives?</b>                                                     |                                                     |

Notes: SOEP Questionnaire. MCS score is calculated using factor analysis based on all items, including physical and mental health (see Anderson et al. (2007) for details). Bold items denote mental health dimension with higher factor loadings. For the SOEP-IS sample, we derive the MCS score slightly differently as the third SF-12 question

(limitations when lifting something heavy or doing something requiring physical mobility) is not asked. Thus, for the SOEP-IS sample there is only one variable for physical functioning whereas for the general sample the average of two variables is used.

Table A2

## Variable Descriptions.

| Variable                                | Description or survey question                                                                                                                      | Available             |
|-----------------------------------------|-----------------------------------------------------------------------------------------------------------------------------------------------------|-----------------------|
| <b>Risk measures</b>                    |                                                                                                                                                     |                       |
| Willingness to take risks in general    | Answer to “How willing are you to take risks, in general?” on scale from 0 (not willing) to 10 (very willing).                                      | 2004, 2006, 2008-2016 |
| Willingness to take risks in ...Driving | Answer to “How willing are you to take risks with respect to...?” on scale from 0 (not willing) to 10 (very willing).                               | 2004, 2009, 2014      |
| ...Finance                              |                                                                                                                                                     |                       |
| ...Sports/Leisure                       |                                                                                                                                                     |                       |
| ...Occupation                           |                                                                                                                                                     |                       |
| ...Health                               |                                                                                                                                                     |                       |
| ...Trust                                |                                                                                                                                                     |                       |
| Risky assets                            | Dummy for household owning risky assets (i.e., securities other than fixed interest securities, such as shares and variable bonds).                 | 2002-2016             |
| No supp. health ins.                    | Dummy for currently not covered by a supplementary private health insurance.                                                                        | 2002-2016             |
| Smoker                                  | Dummy for being a current smoker.                                                                                                                   | Even years 2002-2016  |
| Poor diet                               | Categorical variable indicating agreement to statement that they follow a health-conscious diet on scale from 1 (strongly agree) to 4 (not at all). | Even years 2002-2014  |
| Sedentary                               | Dummy for not exercising at least once a week.                                                                                                      | 2008                  |
| Lend belongings                         | Categorical variable indicating frequency at which the respondent lends belongings to friends on scale from 1 (never) to 5 (very often).            | 2008                  |
| Lend money                              | Categorical variable indicating frequency at which the respondent lends money to friends on scale from 1 (never) to 5 (very often).                 | 2008                  |
| <b>Depression Indicator</b>             |                                                                                                                                                     |                       |
| Depression                              | Dummy for MCS<45.6 indicating suspected depressive disorder.                                                                                        | Even years 2002-2016  |
| <b>Controls</b>                         |                                                                                                                                                     |                       |
| Male                                    | Dummy for being male.                                                                                                                               | Every year            |
| Age                                     | Age (in years).                                                                                                                                     | Every year            |

|                  |                                                                                                                                                                                                      |            |
|------------------|------------------------------------------------------------------------------------------------------------------------------------------------------------------------------------------------------|------------|
| Log income       | Log of CPI adjusted monthly household net income (in EUR).                                                                                                                                           | Every year |
| Edu. high        | Dummy for an upper secondary school degree or higher.                                                                                                                                                | Every year |
| Parent edu. high | Dummy for at least one parent with an upper secondary school degree or higher.                                                                                                                       | Every year |
| German born      | Dummy for being born in Germany.                                                                                                                                                                     | Every year |
| Household type   | Categorical variable indicating individual lives in/as: single; couple w/o children; single parent; couple w children <16y; couple w children ≥16y; couple w children ±16y; multi-generation; other. | Every year |

### Mediators

|                           |                                                                                                                                                                                                                                                                                                                       |                             |
|---------------------------|-----------------------------------------------------------------------------------------------------------------------------------------------------------------------------------------------------------------------------------------------------------------------------------------------------------------------|-----------------------------|
| Log permanent income      | Log of average over all available observations of CPI adjusted monthly household net income (in std. dev.).                                                                                                                                                                                                           | Every year                  |
| Patience                  | Answer to “Are you generally an impatient person, or someone who always shows great patience?” on scale from 0 (very impatient) to 10 (very patient) (in std. dev.).                                                                                                                                                  | 2008, 2013                  |
| Non-impulsivity           | Answer to “Do you generally think things over for a long time before acting — in other words, are you not impulsive at all? Or do you generally act without thinking things over a long time — in other words, are you very impulsive?” on scale from 0 (very impulsive) to 10 (not at all impulsive) (in std. dev.). | 2008, 2013                  |
| Conscientiousness         | Big Five measure of conscientiousness from 3 items (in std. dev.).                                                                                                                                                                                                                                                    | 2005, 2009, 2012, 2013      |
| Internal locus of control | Measure of internal locus of control from 7 items (in std. dev.).                                                                                                                                                                                                                                                     | 2005, 2010, 2015, 2016      |
| Emotional stability       | Big Five measure of emotional stability from 3 items (in std. dev.).                                                                                                                                                                                                                                                  | 2005, 2009, 2012, 2013      |
| Confidence in future      | Answer to “When I think about the future, I'm actually quite optimistic” on scale from 1 (disagree completely) to 4 (agree completely) (in std. dev.).                                                                                                                                                                | 2008, 2013                  |
| Prediction accuracy       | Reversed absolute difference between anticipated satisfaction with life in five years' time and realized satisfaction with life five years later (in std. dev.).                                                                                                                                                      | 2002-2004, 2008, 2009, 2011 |
| Trust                     | Answer to “On the whole one can trust people” on scale from 1 (strongly disagree) to 4 (strongly agree) (in std. dev.).                                                                                                                                                                                               | 2003, 2008                  |
| Cognitive skills          | Average of (usually 2 out of 3) standardized 90-300 seconds cognitive skill tests scores (animal listing task, symbol-digit correspondence task, or Multiple-Choice Vocabulary Intelligence Test) (in std. dev.).                                                                                                     | 2006, 2012, 2016            |

---

Notes: SOEPv33.1i 2002-2016.

Table A3

## Data and Sample Descriptions.

| Analysis                    | Data                      | Depressive | Max. obs.                             | Years of Subsample                     |
|-----------------------------|---------------------------|------------|---------------------------------------|----------------------------------------|
| Behavioral risk preferences | SOEP-IS 2014              | 21%        | 910 obs./<br>910 persons <sup>a</sup> | 2014                                   |
| Stated risk preferences     | SOEP                      |            |                                       | 2004-2016<br>(even years)              |
| Risk-taking behaviors       | 2002-2016<br>(even years) | 27%        | 134,994 obs./<br>40,032 persons       | 2002-2016<br>(even years)              |
| Mediation analysis          |                           |            |                                       | 2008-2016<br>(even years) <sup>b</sup> |

Notes: SOEPv33.1i and SOEP-IS.2016.2. Max. obs. denotes maximal number of observations and unique persons available in this sample; number of observations (persons) may differ between estimations depending on availability of variables (see Appendix Table A2).

<sup>a</sup> 34 observations are dropped from full risky choice experiment data because they completed the task more than once by error (personal correspondence with study researchers) and 6 because they do not have an MCS score.

<sup>b</sup> We extrapolate values for potential mediators from most recent observation if missing in a particular year.

Table A4

## Sample Characteristics, SOEP-IS.

|                              | Mentally Well |      | Depressed |      | Difference |         |
|------------------------------|---------------|------|-----------|------|------------|---------|
|                              | Mean          | Obs. | Mean      | Obs. | Value      | P-value |
| Male                         | 0.485         | 723  | 0.422     | 187  | -0.063     | 0.124   |
| Age                          | 51.307        | 723  | 47.872    | 187  | -3.435     | 0.022   |
| Log income                   | 7.772         | 697  | 7.666     | 180  | -0.106     | 0.023   |
| Edu. high                    | 0.322         | 723  | 0.262     | 187  | -0.060     | 0.113   |
| Parent edu. high             | 0.189         | 723  | 0.182     | 187  | -0.008     | 0.811   |
| German born                  | 0.884         | 723  | 0.861     | 187  | -0.023     | 0.393   |
| <i>Household type</i>        |               |      |           |      |            |         |
| Single                       | 0.211         | 720  | 0.238     | 185  | 0.027      | 0.432   |
| Couple w/o children          | 0.428         | 720  | 0.292     | 185  | -0.136     | 0.001   |
| Single parent                | 0.072         | 720  | 0.108     | 185  | 0.036      | 0.108   |
| Couple w children <16y       | 0.117         | 720  | 0.189     | 185  | 0.073      | 0.009   |
| Couple w children $\geq$ 16y | 0.097         | 720  | 0.097     | 185  | 0.000      | 0.998   |
| Couple w children $\pm$ 16y  | 0.038         | 720  | 0.049     | 185  | 0.011      | 0.489   |
| Multi-generation             | 0.007         | 720  | 0.011     | 185  | 0.004      | 0.593   |
| Other                        | 0.031         | 720  | 0.016     | 185  | -0.014     | 0.289   |

Notes: SOEP-IS.2016.2 2014. Variable definitions are the same as in SOEP, see Appendix Table A2 for detailed descriptions.

Table A5

Sample Characteristics, SOEP.

|                                | Mentally Well |        | Depressed |        | Difference |         |
|--------------------------------|---------------|--------|-----------|--------|------------|---------|
|                                | Mean          | Obs.   | Mean      | Obs.   | Value      | P-value |
| Male                           | 0.500         | 97,706 | 0.402     | 37,288 | -0.098     | 0.000   |
| Age                            | 49.302        | 97,706 | 48.152    | 37,288 | -1.150     | 0.000   |
| Log income                     | 7.900         | 97,706 | 7.754     | 37,288 | -0.146     | 0.000   |
| Edu. high                      | 0.298         | 97,706 | 0.267     | 37,288 | -0.030     | 0.000   |
| Parent edu. high               | 0.172         | 97,706 | 0.159     | 37,288 | -0.013     | 0.000   |
| German born                    | 0.913         | 97,706 | 0.916     | 37,288 | 0.003      | 0.178   |
| <i>Household type</i>          |               |        |           |        |            |         |
| Single                         | 0.142         | 97,706 | 0.174     | 37,288 | 0.032      | 0.000   |
| Couple w/o children            | 0.360         | 97,706 | 0.309     | 37,288 | -0.051     | 0.000   |
| Single parent                  | 0.056         | 97,706 | 0.084     | 37,288 | 0.028      | 0.000   |
| Couple w children <16y         | 0.197         | 97,706 | 0.189     | 37,288 | -0.008     | 0.010   |
| Couple w children ≥16y         | 0.151         | 97,706 | 0.147     | 37,288 | -0.003     | 0.230   |
| Couple w children ±16y         | 0.072         | 97,706 | 0.069     | 37,288 | -0.003     | 0.092   |
| Multi-generation               | 0.012         | 97,706 | 0.016     | 37,288 | 0.004      | 0.000   |
| Other                          | 0.010         | 97,706 | 0.012     | 37,288 | 0.002      | 0.021   |
| <i>Stated risk preferences</i> |               |        |           |        |            |         |
| General                        | 4.801         | 85,339 | 4.358     | 31,690 | -0.443     | 0.000   |
| Driving                        | 3.313         | 24,981 | 3.229     | 9,363  | -0.084     | 0.009   |
| Finance                        | 2.427         | 26,094 | 2.355     | 9,861  | -0.072     | 0.007   |
| Sport/Leisure                  | 3.785         | 26,241 | 3.612     | 9,840  | -0.173     | 0.000   |
| Occupation                     | 3.810         | 23,249 | 3.758     | 9,009  | -0.051     | 0.120   |
| Health                         | 3.083         | 26,525 | 3.182     | 10,010 | 0.099      | 0.001   |
| Trust                          | 3.580         | 26,550 | 3.338     | 10,031 | -0.242     | 0.000   |

Notes: SOEPv33.1i 2002-2016. Means are for the pooled SOEP sample using years in which the MCS (Depression) is recorded (even years between 2002 and 2016). General willingness to take risks is for the even years excluding 2002. For other variables, means are for the years 2004 and 2014. P-values on differences are adjusted for individual clustering. See Appendix Table A2 for variable definitions.



Table A6

Depression and Behavioral Risk Preferences, Full Regression Results using the 2014 SOEP Risk Experiment.

|                                                  | (1)               | (2)                 | (3)                |
|--------------------------------------------------|-------------------|---------------------|--------------------|
| <i>Panel A: Non-parametric logit regressions</i> |                   |                     |                    |
| Depression                                       | 1.187<br>(0.126)  | 1.156<br>(0.127)    | 1.222*<br>(0.146)  |
| Male                                             |                   | 1.174*<br>(0.110)   | 1.232**<br>(0.125) |
| Age                                              |                   | 0.987<br>(0.015)    | 0.982<br>(0.016)   |
| Age2                                             |                   | 1.000<br>(0.000)    | 1.000<br>(0.000)   |
| Log income                                       |                   | 0.804**<br>(0.089)  | 0.801*<br>(0.095)  |
| Edu. high                                        |                   | 0.748***<br>(0.084) | 0.761**<br>(0.091) |
| Parent edu. high                                 |                   | 0.967<br>(0.118)    | 0.968<br>(0.125)   |
| German born                                      |                   | 1.032<br>(0.157)    | 0.993<br>(0.167)   |
| <i>Household type</i>                            |                   |                     |                    |
| Single                                           |                   | 0.845<br>(0.233)    | 0.848<br>(0.259)   |
| Couple w/o children                              |                   | 1.384<br>(0.366)    | 1.332<br>(0.399)   |
| Single parent                                    |                   | 1.448<br>(0.439)    | 1.313<br>(0.442)   |
| Couple w children <16y                           |                   | 1.257<br>(0.354)    | 1.142<br>(0.359)   |
| Couple w children ≥16y                           |                   | 1.012<br>(0.298)    | 0.924<br>(0.305)   |
| Couple w children ±16y                           |                   | 1.364<br>(0.476)    | 1.345<br>(0.536)   |
| Multi-generation                                 |                   | 0.978<br>(0.596)    | 1.045<br>(0.659)   |
| Observations                                     | 3,640             | 3,508               | 2,980              |
| Clusters                                         | 910               | 877                 | 745                |
| <i>Panel B: Structural model estimates</i>       |                   |                     |                    |
| Relative risk aversion ( $\hat{r}$ equation)     |                   |                     |                    |
| Depression                                       | -0.095<br>(0.062) | -0.086<br>(0.061)   | -0.101*<br>(0.057) |
| Male                                             |                   | -0.020<br>(0.015)   | -0.027*<br>(0.016) |
| Age                                              |                   | 0.001<br>(0.002)    | 0.000<br>(0.003)   |
| Age2                                             |                   | 0.000               | 0.000              |

|                                                         |                     |                     |                     |
|---------------------------------------------------------|---------------------|---------------------|---------------------|
|                                                         |                     | (0.000)             | (0.000)             |
| Log income                                              |                     | 0.027<br>(0.017)    | 0.025<br>(0.018)    |
| Edu. high                                               |                     | 0.066***<br>(0.020) | 0.075***<br>(0.021) |
| Parent edu. high                                        |                     | 0.005<br>(0.022)    | 0.003<br>(0.023)    |
| German born                                             |                     | 0.011<br>(0.023)    | 0.016<br>(0.025)    |
| <i>Household type</i>                                   |                     |                     |                     |
| Single                                                  |                     | 0.036<br>(0.045)    | 0.040<br>(0.047)    |
| Couple w/o children                                     |                     | -0.013<br>(0.043)   | -0.007<br>(0.046)   |
| Single parent                                           |                     | -0.020<br>(0.048)   | -0.018<br>(0.052)   |
| Couple w children <16y                                  |                     | 0.018<br>(0.046)    | 0.038<br>(0.049)    |
| Couple w children ≥16y                                  |                     | 0.029<br>(0.050)    | 0.032<br>(0.053)    |
| Couple w children ±16y                                  |                     | 0.033<br>(0.058)    | 0.043<br>(0.063)    |
| Multi-generation                                        |                     | -0.048<br>(0.079)   | -0.032<br>(0.080)   |
| Constant                                                | 0.182***<br>(0.025) | -0.107<br>(0.137)   | -0.012<br>(0.145)   |
| Probability weighting factor ( $\hat{\gamma}$ equation) |                     |                     |                     |
| Depression                                              | 0.093<br>(0.067)    | 0.091<br>(0.067)    | 0.111*<br>(0.063)   |
| Constant                                                | 0.832***<br>(0.027) | 0.828***<br>(0.027) | 0.730***<br>(0.023) |
| Controls                                                | No                  | Yes                 | Yes                 |
| Obs.                                                    | 10,920              | 10,524              | 8,940               |
| Persons                                                 | 910                 | 877                 | 745                 |

Notes: SOEP-IS.2016.2 2014. Non-parametric regressions are binary logit regressions predicting whether the option chosen involved uncertainty (i.e., not option A). Odds ratios are presented. The  $\hat{\gamma}$  equation in the structural model is the coefficient of relative risk aversion for a CRRA utility function (see Appendix B in the Online Appendix, equation (B.1)); the  $\hat{\gamma}$  equation is the probability weighting factor in equation (B.3). Results in Column 3 exclude those who chose option C in scenario 4 (see Table 1). Standard errors are in parentheses and are clustered at the individual level. \*  $p < 0.1$ , \*\*  $p < 0.05$ , \*\*\*  $p < 0.01$ .

Table A7

Depression and Behavioral Risk Preferences, Regression Results using the 2014 SOEP Risk Experiment: Alternate MCS Threshold.

|                                                         | (1)                 | (2)                 | (3)                 |
|---------------------------------------------------------|---------------------|---------------------|---------------------|
| <i>Panel A: Non-parametric logit regressions</i>        |                     |                     |                     |
| Depression                                              | 1.187<br>(0.201)    | 1.076<br>(0.193)    | 1.079<br>(0.210)    |
| Controls                                                | No                  | Yes                 | Yes                 |
| Observations                                            | 3,640               | 3,508               | 2,980               |
| Clusters                                                | 910                 | 877                 | 745                 |
| <i>Panel B: Structural model estimates</i>              |                     |                     |                     |
| Relative risk aversion ( $\hat{\rho}$ equation)         |                     |                     |                     |
| Depression                                              | -0.043<br>(0.084)   | -0.017<br>(0.084)   | -0.013<br>(0.069)   |
| Constant                                                | 0.167***<br>(0.024) | -0.121<br>(0.137)   | -0.024<br>(0.144)   |
| Probability weighting factor ( $\hat{\gamma}$ equation) |                     |                     |                     |
| Depression                                              | 0.005<br>(0.091)    | -0.006<br>(0.092)   | -0.026<br>(0.076)   |
| Constant                                                | 0.849***<br>(0.026) | 0.846***<br>(0.026) | 0.753***<br>(0.023) |
| Controls                                                | No                  | Yes                 | Yes                 |
| Obs.                                                    | 10,920              | 10,524              | 8,940               |
| Persons                                                 | 910                 | 877                 | 745                 |

Notes: SOEP-IS.2016.2 2014. Controls include the following: sex, age, age<sup>2</sup>, log monthly household income, own and parents' upper secondary education or higher, household type (single person; couple w/out children; single parent; couple with children <16y; couple with children 16y+; couple with children <16y and 16y+; multi-generation; other combination (ref. group)) and German born. Non-parametric regressions are binary logit regressions predicting whether the option chosen involved uncertainty (i.e., not option A). Odds ratios are presented. The  $\hat{\rho}$  equation in the structural model is the coefficient of relative risk aversion for a CRRA utility function (see Appendix B in the Online Appendix, equation (B.1)); the  $\hat{\gamma}$  equation is the probability weighting factor in equation (B.3). Results in column 3 exclude those who chose option C in scenario 4 (see Table 1). Standard errors are in parentheses and are clustered at the individual level. \*\*\*  $p < 0.01$ .

Table A8

Depression and Stated Willingness to Take Risks: General and Across Domains, Linear Fixed Effects Regression Results.

|             | General              | Driving          | Finance          | Sport/<br>Leisure | Occupation       | Health           | Trust            |
|-------------|----------------------|------------------|------------------|-------------------|------------------|------------------|------------------|
| Depression  | -0.144***<br>(0.016) | 0.065<br>(0.057) | 0.046<br>(0.053) | 0.053<br>(0.056)  | 0.069<br>(0.068) | 0.050<br>(0.061) | 0.008<br>(0.058) |
| Effect size | -0.031               | 0.021            | 0.021            | 0.015             | 0.019            | 0.017            | 0.002            |
| Obs.        | 117,029              | 34,344           | 35,955           | 36,081            | 32,258           | 36,535           | 36,581           |
| Persons     | 37,774               | 27,927           | 29,107           | 29,308            | 26,860           | 29,626           | 29,661           |

Notes: SOEPv33.1i 2004-2016. Controls include: sex, age, age<sup>2</sup>, log monthly household income, own and parents' upper secondary education or higher, household type (single person; couple w/out children; single parent; couple with children <16y; couple with children 16y+; couple with children <16y and 16y+; multi-generation; other combination (ref. group)), German born and year dummies. Effect sizes are calculated as  $\hat{\beta}/\bar{y}$  where  $\hat{\beta}$  is the estimated Depression coefficient and  $\bar{y}$  is the pooled sample mean for the relevant stated risk preference (the effect size is the percentage change from the mean associated with depression). All dependent variables are measured on a 0-10 scale with higher values indicating greater risk willingness. For the general domain {T} = 2004, 2006, 2008, 2010, 2012, 2014 and 2016. For the other domains {T} = 2004 and 2014. Note that for the fixed effects models, the effective sample size is 'Obs.' minus 'Clusters' for each specific domain (i.e., people appearing in both 2004 and 2014). Standard errors are in parentheses and are clustered at the individual level. \*\*\*  $p < 0.01$ .

Table A9

MCS score and Stated Willingness to Take Risks: General and Across Domains, Pooled OLS Results.

|                               | General             | Driving             | Finance              | Sport/<br>Leisure  | Occupation        | Health               | Trust               |
|-------------------------------|---------------------|---------------------|----------------------|--------------------|-------------------|----------------------|---------------------|
| <i>Panel A: No controls</i>   |                     |                     |                      |                    |                   |                      |                     |
| MCS                           | 0.024***<br>(0.001) | -0.000<br>(0.002)   | 0.001<br>(0.001)     | 0.003*<br>(0.001)  | -0.002<br>(0.002) | -0.010***<br>(0.001) | 0.011***<br>(0.001) |
| <i>Panel B: With controls</i> |                     |                     |                      |                    |                   |                      |                     |
| MCS                           | 0.022***<br>(0.001) | -0.003**<br>(0.001) | -0.005***<br>(0.001) | 0.003**<br>(0.001) | -0.002<br>(0.001) | -0.011***<br>(0.001) | 0.009***<br>(0.001) |
| Obs.                          | 117,029             | 34,344              | 35,955               | 36,081             | 32,258            | 36,535               | 36,581              |
| Persons                       | 37,774              | 27,927              | 29,107               | 29,308             | 26,860            | 29,626               | 29,661              |

Notes: SOEPv33.1i 2004-2016. Controls include: sex, age, age<sup>2</sup>, log monthly household income, own and parents' upper secondary education or higher, household type (single person; couple w/out children; single parent; couple with children <16y; couple with children 16y+; couple with children <16y and 16y+; multi-generation; other combination (ref. group)), German born and year dummies. All dependent variables are measured on a 0-10 scale with higher values indicating greater risk willingness. For the general domain {T} = 2004, 2006, 2008, 2010, 2012, 2014 and 2016. For the other domains {T} = 2004 and 2014. Standard errors are in parentheses and are clustered at the individual level. \*  $p < 0.10$ , \*\*  $p < 0.05$ , \*\*\*  $p < 0.01$ .

Table A10

Alternate MCS Threshold and Stated Willingness to Take Risks: General and Across Domains, Pooled OLS Results.

|                               | General              | Driving              | Finance              | Sport/<br>Leisure    | Occupation           | Health             | Trust                |
|-------------------------------|----------------------|----------------------|----------------------|----------------------|----------------------|--------------------|----------------------|
| <i>Panel A: No controls</i>   |                      |                      |                      |                      |                      |                    |                      |
| MCS                           | -0.616***<br>(0.029) | -0.205***<br>(0.048) | -0.193***<br>(0.039) | -0.263***<br>(0.047) | -0.157***<br>(0.049) | 0.027<br>(0.046)   | -0.374***<br>(0.043) |
| <i>Panel B: With controls</i> |                      |                      |                      |                      |                      |                    |                      |
| MCS                           | -0.515***<br>(0.027) | -0.063<br>(0.045)    | -0.026<br>(0.037)    | -0.164***<br>(0.041) | -0.058<br>(0.045)    | 0.105**<br>(0.044) | -0.287***<br>(0.042) |
| Obs.                          | 117,029              | 34,344               | 35,955               | 36,081               | 32,258               | 36,535             | 36,581               |
| Persons                       | 37,774               | 27,927               | 29,107               | 29,308               | 26,860               | 29,626             | 29,661               |

Notes: SOEPv33.1i 2004-2016. Controls include: sex, age, age<sup>2</sup>, log monthly household income, own and parents' upper secondary education or higher, household type (single person; couple w/out children; single parent; couple with children <16y; couple with children 16y+; couple with children <16y and 16y+; multi-generation; other combination (ref. group)), German born and year dummies. All dependent variables are measured on a 0-10 scale with higher values indicating greater risk willingness. For the general domain {T} = 2004, 2006, 2008, 2010, 2012, 2014 and 2016. For the other domains {T} = 2004 and 2014. Standard errors are in parentheses and are clustered at the individual level. \*\*  $p < 0.05$ , \*\*\*  $p < 0.01$ .

Table A11

## MCS Score and Risk-taking Behaviors in the Financial Domain.

|                               | Risky assets         | Risky assets         | No supp.<br>health ins. | No supp.<br>health ins. |
|-------------------------------|----------------------|----------------------|-------------------------|-------------------------|
| MCS                           | 0.006***<br>(0.001)  | 0.001**<br>(0.001)   | -0.005***<br>(0.001)    | -0.002***<br>(0.001)    |
| <i>Average partial effect</i> | 0.002***<br>(0.0001) | 0.0003**<br>(0.0002) | -0.001***<br>(0.0002)   | -0.0004***<br>(0.0002)  |
| Controls                      | No                   | Yes                  | No                      | Yes                     |
| Obs.                          | 132,597              | 132,597              | 114,235                 | 114,235                 |
| Persons                       | 38,103               | 38,103               | 35,244                  | 35,244                  |
| Pseudo R <sup>2</sup>         | 0.001                | 0.127                | 0.001                   | 0.100                   |

Notes: SOEPv33.1i 2002-2016. Risky assets = 1 if household owns risky assets (i.e., securities other than fixed interest securities, such as shares and variable bonds). Mean = 0.314. No health insurance = 1 if not currently covered by a supplementary private health insurance policy. Mean = 0.805. Controls include: sex, age, age<sup>2</sup>, log monthly household income, own and parents' upper secondary education or higher, household type (single person; couple w/out children; single parent; couple with children <16y; couple with children 16y+; couple with children <16y and 16y+; multi-generation; other combination (ref. group)), German born and year dummies. Average partial effects are the sample mean change in the predicted probability when increasing MCS by one unit. Standard errors are in parentheses and are clustered at the individual level. Standard errors for average partial effects are calculated using the delta method. \*\*  $p < 0.05$ , \*\*\*  $p < 0.01$ .

Table A12

## Alternate MCS Threshold and Risk-taking Behaviors in the Financial Domain.

|                               | Risky assets         | Risky assets         | No supp.<br>health ins. | No supp.<br>health ins. |
|-------------------------------|----------------------|----------------------|-------------------------|-------------------------|
| MCS                           | -0.183***<br>(0.016) | -0.067***<br>(0.016) | 0.114***<br>(0.018)     | 0.035*<br>(0.019)       |
| <i>Average partial effect</i> | -0.006***<br>(0.005) | -0.020***<br>(0.005) | 0.030***<br>(0.005)     | 0.009*<br>(0.005)       |
| Controls                      | No                   | Yes                  | No                      | Yes                     |
| Obs.                          | 132,597              | 132,597              | 114,235                 | 114,235                 |
| Persons                       | 38,103               | 38,103               | 35,244                  | 35,244                  |
| Pseudo R <sup>2</sup>         | 0.001                | 0.127                | 0.001                   | 0.100                   |

Notes: SOEPv33.1i 2002-2016. Risky assets = 1 if household owns risky assets (i.e., securities other than fixed interest securities, such as shares and variable bonds). Mean = 0.314. No health insurance = 1 if not currently covered by a supplementary private health insurance policy. Mean = 0.805. Controls include: sex, age, age<sup>2</sup>, log monthly household income, own and parents' upper secondary education or higher, household type (single person; couple w/out children; single parent; couple with children <16y; couple with children 16y+; couple with children <16y and 16y+; multi-generation; other combination (ref. group)), German born and year dummies. Average partial effects are the sample mean change in the predicted probability when increasing MCS by one unit. Standard errors are in parentheses and are clustered at the individual level. Standard errors for average partial effects are calculated using the delta method. \*  $p < 0.10$ , \*\*\*  $p < 0.01$ .



Table A13

## MCS Score and Risk-taking Behaviors in the Health Domain.

|                                | Smoker                | Smoker                | Poor diet             | Poor diet             | Sedentary             | Sedentary             |
|--------------------------------|-----------------------|-----------------------|-----------------------|-----------------------|-----------------------|-----------------------|
| MCS                            | -0.009***<br>(0.001)  | -0.005***<br>(0.001)  | -0.006***<br>(0.0005) | -0.006***<br>(0.0005) | -0.012***<br>(0.001)  | -0.012***<br>(0.001)  |
| <i>Average partial effect:</i> |                       |                       |                       |                       |                       |                       |
| Pr(Y = 1)                      | -0.003***<br>(0.0002) | -0.002***<br>(0.0002) | 0.001***<br>(0.0001)  | 0.001***<br>(0.0001)  | -0.005***<br>(0.0004) | -0.004***<br>(0.0004) |
| Pr(Y = 2)                      |                       |                       | 0.002***<br>(0.0001)  | 0.001***<br>(0.0001)  |                       |                       |
| Pr(Y = 3)                      |                       |                       | -0.002***<br>(0.0001) | -0.002***<br>(0.0001) |                       |                       |
| Pr(Y = 4)                      |                       |                       | -0.001***<br>(0.0001) | -0.001***<br>(0.0001) |                       |                       |
| Controls                       | No                    | Yes                   | No                    | Yes                   | No                    | Yes                   |
| Obs.                           | 118,999               | 118,999               | 96,172                | 96,172                | 15,045                | 15,045                |
| Persons                        | 38,287                | 38,287                | 33,915                | 33,915                | 15,045                | 15,045                |
| Pseudo R <sup>2</sup>          | 0.004                 | 0.112                 | 0.002                 | 0.043                 | 0.006                 | 0.071                 |

Notes: SOEPv33.1i 2002-2016. Smoker = 1 if current smoker. Mean = 0.308. Poor diet is a categorical variable (1-4 scale) indicating agreement to the statement that they follow a health-conscious diet (1 = strongly agree, 4 = not at all). The distribution from 1-4 is 0.092, 0.419, 0.429 and 0.060. Sedentary = 1 if participates in sports/exercise less than once per week. Mean = 0.581. Controls include: sex, age, age<sup>2</sup>, log monthly household income, own and parents' upper secondary education or higher, household type (single person; couple w/out children; single parent; couple with children <16y; couple with children 16y+; couple with children <16y and 16y+; multi-generation; other combination (ref. group)), German born and year dummies. Average partial effects are the sample mean change in the predicted probability when increasing MCS by one unit. For Poor diet, the average partial effects are the change in predicted probability for each of the four possible responses. Standard errors are in parentheses and are clustered at the individual level. Standard errors for average partial effects are calculated using the delta method. \*\*\*  $p < 0.01$ .

Table A14

## Alternate MCS Threshold and Risk-taking Behaviors in the Health Domain.

|                                | Smoker              | Smoker              | Poor diet            | Poor diet            | Sedentary           | Sedentary           |
|--------------------------------|---------------------|---------------------|----------------------|----------------------|---------------------|---------------------|
| MCS                            | 0.215***<br>(0.016) | 0.165***<br>(0.017) | 0.081***<br>(0.014)  | 0.095***<br>(0.014)  | 0.256***<br>(0.036) | 0.236***<br>(0.037) |
| <i>Average partial effect:</i> |                     |                     |                      |                      |                     |                     |
| Pr(Y = 1)                      | 0.078***<br>(0.006) | 0.053***<br>(0.006) | -0.013***<br>(0.002) | -0.014***<br>(0.002) | 0.097***<br>(0.013) | 0.084***<br>(0.013) |
| Pr(Y = 2)                      |                     |                     | -0.019***<br>(0.004) | -0.022***<br>(0.003) |                     |                     |
| Pr(Y = 3)                      |                     |                     | 0.022***<br>(0.004)  | 0.025***<br>(0.004)  |                     |                     |
| Pr(Y = 4)                      |                     |                     | 0.010***<br>(0.002)  | 0.011***<br>(0.002)  |                     |                     |
| Controls                       | No                  | Yes                 | No                   | Yes                  | No                  | Yes                 |
| Obs.                           | 118,999             | 118,999             | 96,172               | 96,172               | 15,045              | 15,045              |
| Persons                        | 38,287              | 38,287              | 33,915               | 33,915               | 15,045              | 15,045              |
| Pseudo R <sup>2</sup>          | 0.002               | 0.112               | 0.000                | 0.042                | 0.002               | 0.068               |

Notes: SOEPv33.1i 2002-2016. Smoker = 1 if current smoker. Mean = 0.308. Poor diet is a categorical variable (1-4 scale) indicating agreement to the statement that they follow a health-conscious diet (1 = strongly agree, 4 = not at all). The distribution from 1-4 is 0.092, 0.419, 0.429 and 0.060. Sedentary = 1 if participates in sports/exercise less than once per week. Mean = 0.581. Controls include: sex, age, age<sup>2</sup>, log monthly household income, own and parents' upper secondary education or higher, household type (single person; couple w/out children; single parent; couple with children <16y; couple with children 16y+; couple with children <16y and 16y+; multi-generation; other combination (ref. group)), German born and year dummies. Average partial effects are the sample mean change in the predicted probability when increasing MCS by one unit. For Poor diet, the average partial effects are the change in predicted probability for each of the four possible responses. Standard errors are in parentheses and are clustered at the individual level. Standard errors for average partial effects are calculated using the delta method. \*\*\*  $p < 0.01$ .

Table A15

## MCS Score and Risk-taking Behaviors in the Social Domain.

|                                | Lend belongings      | Lend belongings        | Lend money              | Lend money              |
|--------------------------------|----------------------|------------------------|-------------------------|-------------------------|
| MCS                            | 0.000<br>(0.001)     | 0.003***<br>(0.001)    | -0.008***<br>(0.001)    | -0.006***<br>(0.001)    |
| <i>Average partial effect:</i> |                      |                        |                         |                         |
| Pr(Y = 1)                      | -0.0001<br>(0.0002)  | -0.001***<br>(0.0002)  | 0.003***<br>(0.0004)    | 0.002***<br>(0.0004)    |
| Pr(Y = 2)                      | -0.00005<br>(0.0001) | -0.0004***<br>(0.0001) | -0.001***<br>(0.0002)   | -0.001***<br>(0.0002)   |
| Pr(Y = 3)                      | 0.00004<br>(0.0001)  | 0.0004***<br>(0.0001)  | -0.001***<br>(0.0002)   | -0.001***<br>(0.0002)   |
| Pr(Y = 4)                      | 0.0001<br>(0.0002)   | 0.001***<br>(0.0002)   | -0.0004***<br>(0.0001)  | -0.0003***<br>(0.00005) |
| Pr(Y = 5)                      | 0.00002<br>(0.0001)  | 0.0002***<br>(0.0001)  | -0.0001***<br>(0.00002) | -0.0001***<br>(0.00001) |
| Controls                       | No                   | Yes                    | No                      | Yes                     |
| Obs.                           | 15,015               | 15,015                 | 15,011                  | 15,011                  |
| Persons                        | 15,015               | 15,015                 | 15,011                  | 15,011                  |
| Pseudo R <sup>2</sup>          | 0.000                | 0.058                  | 0.002                   | 0.078                   |

Notes: SOEPv33.li 2008. Lend belongings is a categorical variable (1-5 scale) indicating the frequency at which the respondent lends belongings to friends (1 = never, 5 = very often). The distribution from 1-5 is 0.167, 0.296, 0.345, 0.160 and 0.032. Lend money is a categorical variable (1-5 scale) indicating the frequency at which the respondent lends money to friends (1 = never, 5 = very often). The distribution from 1-5 is 0.538, 0.319, 0.116, 0.023 and 0.004. Controls include: sex, age, age<sup>2</sup>, log monthly household income, own and parents' upper secondary education or higher, household type (single person; couple w/out children; single parent; couple with children <16y; couple with children 16y+; couple with children <16y and 16y+; multi-generation; other combination (ref. group)) and German born. Average partial effects are the sample mean change in the predicted probability when increasing MCS by one unit. Robust standard errors are in parentheses. Standard errors for average partial effects are calculated using the delta method. \*\*\*  $p < 0.01$ .

Table A16

## Alternate MCS Threshold and Risk-taking Behaviors in the Social Domain.

|                                | Lend belongings      | Lend belongings      | Lend money          | Lend money         |
|--------------------------------|----------------------|----------------------|---------------------|--------------------|
| MCS                            | -0.105***<br>(0.032) | -0.128**<br>(0.032)  | 0.060*<br>(0.033)   | 0.045<br>(0.034)   |
| <i>Average partial effect:</i> |                      |                      |                     |                    |
| Pr(Y = 1)                      | 0.027***<br>(0.009)  | 0.030***<br>(0.008)  | -0.024*<br>(0.013)  | -0.016<br>(0.012)  |
| Pr(Y = 2)                      | 0.014***<br>(0.004)  | 0.016***<br>(0.004)  | 0.010*<br>(0.005)   | 0.007<br>(0.005)   |
| Pr(Y = 3)                      | -0.014***<br>(0.005) | -0.016***<br>(0.004) | 0.010*<br>(0.006)   | 0.007<br>(0.005)   |
| Pr(Y = 4)                      | -0.021***<br>(0.006) | -0.023***<br>(0.005) | 0.003*<br>(0.002)   | 0.002<br>(0.002)   |
| Pr(Y = 5)                      | -0.007***<br>(0.002) | -0.008***<br>(0.002) | 0.0008*<br>(0.0005) | 0.0005<br>(0.0004) |
| Controls                       | No                   | Yes                  | No                  | Yes                |
| Obs.                           | 15,015               | 15,015               | 15,011              | 15,011             |
| Persons                        | 15,015               | 15,015               | 15,011              | 15,011             |
| Pseudo R <sup>2</sup>          | 0.000                | 0.058                | 0.000               | 0.077              |

Notes: SOEPv33.li 2008. Lend belongings is a categorical variable (1-5 scale) indicating the frequency at which the respondent lends belongings to friends (1 = never, 5 = very often). The distribution from 1-5 is 0.167, 0.296, 0.345, 0.160 and 0.032. Lend money is a categorical variable (1-5 scale) indicating the frequency at which the respondent lends money to friends (1 = never, 5 = very often). The distribution from 1-5 is 0.538, 0.319, 0.116, 0.023 and 0.004. Controls include: sex, age, age<sup>2</sup>, log monthly household income, own and parents' upper secondary education or higher, household type (single person; couple w/out children; single parent; couple with children <16y; couple with children 16y+; couple with children <16y and 16y+; multi-generation; other combination (ref. group)) and German born. Average partial effects are the sample mean change in the predicted probability when increasing MCS by one unit. Robust standard errors are in parentheses. Standard errors for average partial effects are calculated using the delta method. \*  $p < 0.10$ , \*\*  $p < 0.05$ , \*\*\*  $p < 0.01$ .

Table A17

## Unconditional Summary Statistics of Potential Mediators.

|                                           | Means                   |                  | Difference<br>(2) - (1) | Equality of means |         |
|-------------------------------------------|-------------------------|------------------|-------------------------|-------------------|---------|
|                                           | Mentally<br>Well<br>(1) | Depressed<br>(2) |                         | t-stat.           | p-value |
| <b>Budget constraints and discounting</b> |                         |                  |                         |                   |         |
| Log permanent income                      | 0.075                   | -0.193           | -0.268                  | 29.628            | 0.000   |
| Patience                                  | 0.061                   | -0.158           | -0.219                  | 24.150            | 0.000   |
| <b>Time-inconsistent preferences</b>      |                         |                  |                         |                   |         |
| Internal locus of control                 | 0.154                   | -0.399           | -0.553                  | 62.780            | 0.000   |
| Non-impulsivity                           | -0.021                  | 0.054            | 0.075                   | -8.276            | 0.000   |
| Conscientiousness                         | 0.067                   | -0.173           | -0.240                  | 26.604            | 0.000   |
| <b>Emotions and expectations</b>          |                         |                  |                         |                   |         |
| Emotional stability                       | 0.175                   | -0.453           | -0.628                  | 71.969            | 0.000   |
| Confidence in future                      | 0.112                   | -0.289           | -0.401                  | 44.749            | 0.000   |
| Prediction accuracy                       | 0.080                   | -0.208           | -0.288                  | 32.035            | 0.000   |
| Trust                                     | 0.084                   | -0.217           | -0.301                  | 33.313            | 0.000   |
| Obs.                                      | 43,427                  | 16,770           |                         |                   |         |

Notes: SOEPv33.1i 2008-2016. All measures are standardized to mean of zero and variance one.

Table A18

Percentage Contribution to Mediation, Including General Cognitive Skills as a Mediator.

|                                           | Risky assets | No supp.<br>health ins. | Smoker       | Poor diet    | Sedentary    | Lend<br>belongings | Lend money    |
|-------------------------------------------|--------------|-------------------------|--------------|--------------|--------------|--------------------|---------------|
| <b>Budget constraints and discounting</b> |              |                         |              |              |              |                    |               |
| Log permanent income                      | 3.74         | 3.26                    | 1.08         | 1.04         | 0.15         | 0.36               | -0.90         |
| Patience                                  | -0.82        | -2.54                   | 2.55         | 4.42         | 1.35         | 5.19               | -8.28         |
| <b>Time-inconsistent preferences</b>      |              |                         |              |              |              |                    |               |
| Internal locus of control                 | 25.68        | 59.73                   | -9.15        | 12.58        | 5.16         | 13.04              | -6.80         |
| Non-impulsivity                           | -0.32        | 7.37                    | -4.99        | 1.23         | 1.50         | 4.10               | -8.52         |
| Conscientiousness                         | -3.92        | -7.90                   | -2.50        | 14.22        | -0.73        | 1.38               | 8.02          |
| <b>Emotions and expectations</b>          |              |                         |              |              |              |                    |               |
| Emotional Stability                       | 14.39        | -20.54                  | -15.93       | -11.53       | 0.71         | -10.43             | -6.64         |
| Confidence in future                      | 12.48        | 39.73                   | 14.76        | 11.63        | 4.64         | 4.12               | 1.75          |
| Prediction accuracy                       | 3.10         | 3.21                    | 10.81        | 0.24         | 0.51         | 8.72               | -6.99         |
| Trust                                     | 11.68        | 22.11                   | 16.73        | 10.47        | 9.05         | 33.71              | -45.35        |
| Cognitive skills                          | 8.56         | 20.51                   | 1.13         | 2.87         | 2.34         | 5.29               | -8.79         |
| <b>Total</b>                              | <b>74.58</b> | <b>124.93</b>           | <b>14.49</b> | <b>47.16</b> | <b>24.68</b> | <b>65.48</b>       | <b>-82.50</b> |
| Obs.                                      | 18,239       | 15,199                  | 16,501       | 13,919       | 3,037        | 3,022              | 3,021         |
| Persons                                   | 6,488        | 5,554                   | 6,432        | 5,062        | 3,037        | 3,022              | 3,021         |

Notes: SOEPv33.1i 2008-2016. Only mediation results are displayed. Controls are included in each estimation.

Table A19

Percentage Contribution to Mediation, Including Stated Willingness to Take Risks as a Mediator.

|                                           | Risky assets | No supp.<br>health ins. | Smoker       | Poor diet    | Sedentary    | Lend<br>belongings | Lend money    |
|-------------------------------------------|--------------|-------------------------|--------------|--------------|--------------|--------------------|---------------|
| <b>Budget constraints and discounting</b> |              |                         |              |              |              |                    |               |
| Log permanent income                      | 8.90         | 5.44                    | 1.37         | 1.13         | 1.56         | 3.04               | -1.04         |
| Patience                                  | -7.49        | -13.09                  | 2.42         | 7.14         | 0.39         | 16.30              | -11.06        |
| <b>Time-inconsistent preferences</b>      |              |                         |              |              |              |                    |               |
| Internal locus of control                 | 82.52        | 116.81                  | -0.98        | 7.28         | 14.29        | 20.49              | -10.29        |
| Non-impulsivity                           | -6.65        | 12.97                   | -7.84        | -0.31        | 1.09         | 15.49              | -4.14         |
| Conscientiousness                         | -33.14       | -17.06                  | -0.45        | 26.21        | -2.39        | -4.92              | 15.22         |
| <b>Emotions and expectations</b>          |              |                         |              |              |              |                    |               |
| Emotional Stability                       | -37.09       | -32.63                  | -27.72       | -7.81        | -0.90        | -9.97              | 2.13          |
| Confidence in future                      | 30.60        | 17.76                   | 15.32        | 6.56         | 5.49         | 7.68               | -6.07         |
| Prediction accuracy                       | 4.71         | 0.12                    | 17.56        | 0.49         | 7.09         | 9.95               | -1.43         |
| Trust                                     | 23.52        | 14.40                   | 20.53        | 7.44         | 12.01        | 67.14              | -20.97        |
| General risk preference                   | 9.86         | 10.18                   | -8.64        | 2.07         | 3.36         | 18.07              | -15.73        |
| <b>Total</b>                              | <b>75.75</b> | <b>114.90</b>           | <b>11.57</b> | <b>50.21</b> | <b>41.99</b> | <b>143.27</b>      | <b>-53.39</b> |
| Obs.                                      | 51,041       | 42,602                  | 46,204       | 42,295       | 11,889       | 11,868             | 11,864        |
| Persons                                   | 15,797       | 13,581                  | 15,774       | 14,623       | 11,889       | 11,868             | 11,864        |

Notes: SOEPv33.1i 2008-2016. Only mediation results are displayed. Controls are included in each estimation.

Table A20

Percentage Contribution to Mediation, Excluding Log Current Income.

|                                           | Risky assets | No supp.<br>health ins. | Smoker       | Poor diet    | Sedentary    | Lend<br>belongings | Lend money     |
|-------------------------------------------|--------------|-------------------------|--------------|--------------|--------------|--------------------|----------------|
| <b>Budget constraints and discounting</b> |              |                         |              |              |              |                    |                |
| Log permanent income                      | 58.02        | 59.60                   | 16.79        | 10.82        | 18.61        | 26.48              | -22.26         |
| Patience                                  | -2.79        | -4.28                   | 1.97         | 6.21         | 0.44         | 11.50              | -15.59         |
| <b>Time-inconsistent preferences</b>      |              |                         |              |              |              |                    |                |
| Internal locus of control                 | 33.87        | 39.56                   | -1.74        | 7.09         | 12.75        | 16.71              | -17.44         |
| Non-impulsivity                           | -2.05        | 4.85                    | -8.47        | 0.05         | 2.07         | 16.53              | -14.45         |
| Conscientiousness                         | -12.48       | -5.26                   | -0.41        | 23.53        | -1.96        | -3.40              | 20.18          |
| <b>Emotions and expectations</b>          |              |                         |              |              |              |                    |                |
| Emotional Stability                       | -12.14       | -7.91                   | -25.84       | -6.19        | 0.27         | -2.59              | -4.58          |
| Confidence in future                      | 13.76        | 7.47                    | 12.79        | 6.44         | 5.45         | 8.78               | -13.90         |
| Prediction accuracy                       | 2.18         | 0.61                    | 15.69        | 0.52         | 6.07         | 7.08               | -2.03          |
| Trust                                     | 9.73         | 5.02                    | 18.15        | 7.32         | 10.52        | 49.51              | -31.38         |
| <b>Total</b>                              | <b>88.09</b> | <b>99.65</b>            | <b>28.92</b> | <b>55.79</b> | <b>54.20</b> | <b>130.60</b>      | <b>-101.45</b> |
| Obs.                                      | 51,178       | 42,707                  | 46,332       | 42,418       | 11,892       | 11,871             | 11,867         |
| Persons                                   | 15,801       | 13,583                  | 15,778       | 14,630       | 11,892       | 11,871             | 11,867         |

Notes: SOEPv33.1i 2008-2016. Only mediation results are displayed. Controls are included in each estimation except for current log income.



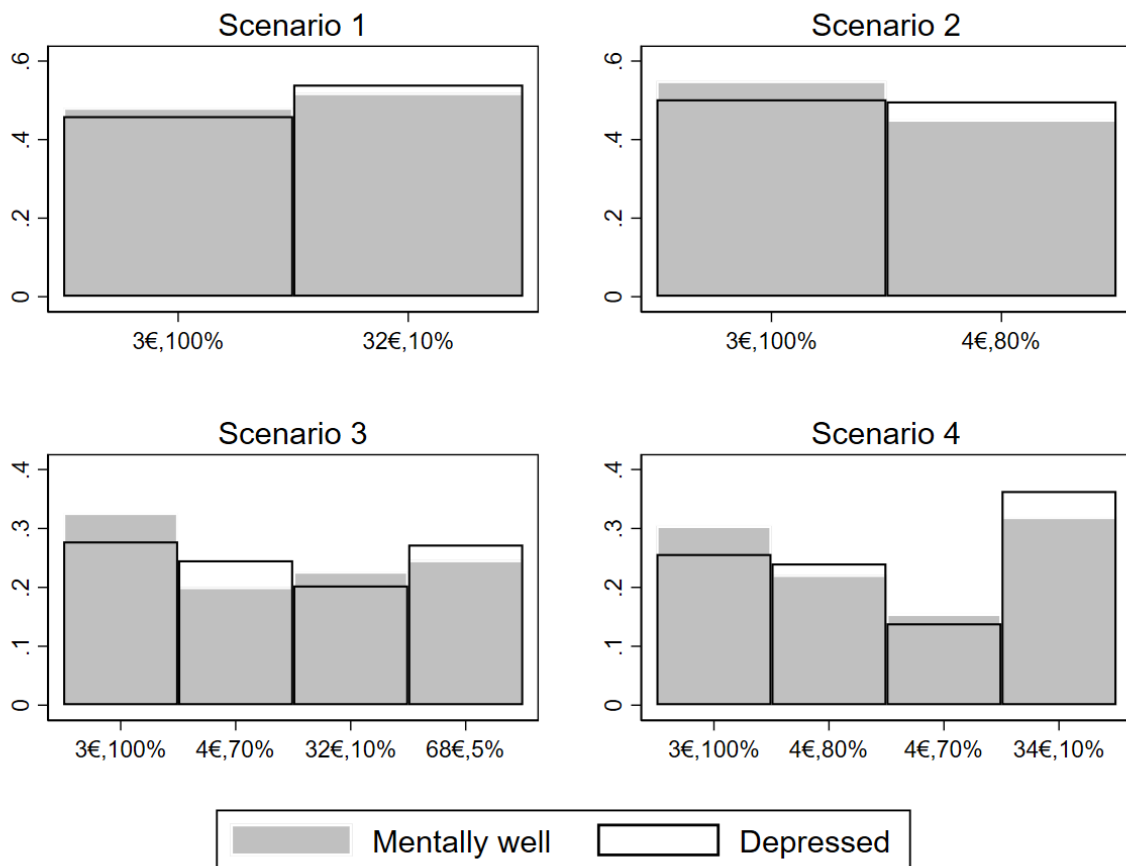

Figure A1:

Choice Distributions Associated with the 2014 SOEP Risk Experiment.

Notes: SOEP-IS.2016.2 2014. Each scenario includes 910 participants. The labels on the x-axis are the payoffs (in euros) and probabilities (in %) for the favorable outcome (unfavorable outcomes pay nothing). The choices are generally similar for those who are depressed vs. mentally well. Mann-Whitney tests fail to reject the null of equal distribution in all scenarios.

## Appendix B — Details on Estimation of Experimental Data (Section III.A)

### *Structural estimation of the utility function*

In Section III.A we conduct structural estimation of a model in which people's choices are made so as to maximize the following constant relative risk aversion expected utility function:

$$(B.1) \quad E[U] = \pi_{j,s} \cdot \frac{(W + B_{j,s})^{1-r}}{1-r}$$

In equation (B.1),  $r$  is the coefficient of relative risk aversion (risk aversion is increasing in  $r$ ),  $W$  is a reference point (which we set to zero),  $B_{j,s}$  is the payoff from a favorable outcome of choice  $j$  in scenario  $s$  and  $\pi_{j,s}$  is the probability associated with the favorable outcome. Note that the payoff for unfavorable outcomes is always zero.

In each scenario, people are assumed to evaluate the expected utility of each option and choose an option if  $E[U|choice = j] + \varepsilon_{i,j} > E[U|choice = k] + \varepsilon_{i,k} \forall k \neq j$  where  $\varepsilon_{i,j}$  and  $\varepsilon_{i,k}$  are random error terms associated with options  $j$  and  $k$  respectively, which are assumed to follow a standard type I extreme value distribution. This implies that  $r$  can be estimated by maximum likelihood with the probabilities of choosing option  $j$  in scenario  $s$  given by:

$$(B.2) \quad P_{j,s} = \frac{\exp\left(\pi_{j,s} \cdot \frac{B_{j,s}^{1-r}}{1-r}\right)}{\sum_{j=1}^J \exp\left(\pi_{j,s} \cdot \frac{B_{j,s}^{1-r}}{1-r}\right)}$$

As demonstrated in Kahneman and Tversky (1979), people frequently overweight low-probability events, which can affect estimates of  $r$ . A popular strategy for accounting for this is to adopt a rank-dependent expected utility model in which people use non-linear transformations of the probabilities when evaluating options (see Quiggin 1982; Yaari 1987). We use the weighting function of Tversky and Kahneman (1992) and replace  $\pi_{j,s}$  with

$$(B.3) \quad w_{j,s} = \pi_{j,s}^\gamma / \left(\pi_{j,s}^\gamma + (1 - \pi_{j,s}^\gamma)\right)^{\frac{1}{\gamma}}$$

in equation (B.2), where  $\gamma$  is a new parameter to be estimated. If  $\gamma < 1$ , then the weighting function follows an inverse S-shape, which gives higher (lower) weight to low (high) probability outcomes. In our estimation we allow for both  $r$  and  $\gamma$  to depend on depression-risk (along with a host of other observables).

## References

- Andersen, Hanfried H., Axel Mühlbacher, Matthias Nübling, Jürgen Schupp, and Gert G. Wagner. 2007. "Computation of Standard Values for Physical and Mental Health Scale Scores Using the SOEP Version of SF-12v2." *Schmollers Jahrbuch: Journal of Applied Social Science Studies / Zeitschrift für Wirtschafts- und Sozialwissenschaften* 127(1):171-82.
- Kahneman, Daniel, and Amos Tversky. 1979. "Prospect Theory: An Analysis of Decision Under Risk." *Econometrica* 47(2):263-92.
- Quiggin, John. 1982. "A Theory of Anticipated Utility." *Journal of Economic Behavior & Organization* 3(4):323-43.
- Tversky, Amos, and Daniel Kahneman. 1992. "Advances in Prospect Theory: Cumulative Representation of Uncertainty." *Journal of Risk and Uncertainty* 5(4):297-323.
- Yaari, Menahem E. 1987. "The Dual Theory of Choice under Risk." *Econometrica* 55(1):95-115.
